# Supplementary material for: Solid state coordination chemistry: ligand influences on the structures of one-dimensional copper(i) cyanide–organodiimine solids
Source: Royal Society of Chemistry journal article supplement (doi:10.1039/b100392p), 2001-01-01
Supplement: b100392p-3.doc [file b100392p-3.doc]

Table 1. Crystal data and structure refinement for Cu3(CN)3(2,2'-biquin)2.

Identification code [Cu3(CN)3(2,2'-biquin)2]

Empirical formula C39H24Cu3N7

Formula weight 781.27

Temperature 293(2) K

Wavelength 0.71073 Å

Crystal system Monoclinic

Space group C2/m

Unit cell dimensions a = 13.6666(2) Å = 90°.

b = 15.3303(2) Å = 96.751(2)°.

c = 7.8477(2) Å  = 90°.

Volume 1632.80(5) Å3

Z 2

Density (calculated) 1.589 Mg/m3

Absorption coefficient 1.977 mm-1

F(000) 788

Crystal size 0.17 x 0.11 x 0.05 mm3

Theta range for data collection 2.00 to 28.26°.

Index ranges -18<=h<=15, -20<=k<=16, -9<=l<=10

Reflections collected 5322

Independent reflections 2003 [R(int) = 0.0314]

Completeness to theta = 28.26° 95.7 %

Absorption correction SADABS

Refinement method Full-matrix least-squares on F2

Data / restraints / parameters 2003 / 0 / 119

Goodness-of-fit on F2 1.166

Final R indices [I>2sigma(I)] R1 = 0.0343, wR2 = 0.0734

R indices (all data) R1 = 0.0404, wR2 = 0.0766

Largest diff. peak and hole 0.457 and -0.407 e.Å-3

Table 2. Atomic coordinates ( x 104) and equivalent isotropic displacement parameters (Å2x 103) for Cu3(CN)3(2,2'-biquin)2. U(eq) is defined as one third of the trace of the orthogonalized Uij tensor.

________________________________________________________________________

x y z U(eq)

________________________________________________________________________

Cu(2) 0 0 0 26(1)

Cu(1) 3320(1) 0 -1732(1) 20(1)

N(4) 3539(1) 860(1) -3727(2) 17(1)

C(4) 3678(2) 488(1) -5211(3) 18(1)

C(5) 3851(2) 981(2) -6669(3) 23(1)

C(6) 3878(2) 1871(2) -6557(3) 25(1)

C(7) 3745(2) 2287(2) -4997(3) 23(1)

C(8) 3779(2) 3209(2) -4764(4) 29(1)

C(9) 3678(2) 3561(2) -3196(4) 34(1)

C(10) 3532(2) 3023(2) -1794(4) 34(1)

C(11) 3478(2) 2135(2) -1981(3) 26(1)

C(12) 3581(2) 1750(2) -3590(3) 20(1)

C(1) 1243(2) 0 -643(4) 23(1)

C(2) 2036(3) 0 -1024(4) 28(1)

C(3) 4599(2) 0 -340(4) 21(1)

N(1) 1243(2) 0 -643(4) 23(1)

N(2) 2036(3) 0 -1024(4) 28(1)

N(3) 4599(2) 0 -340(4) 21(1)

________________________________________________________________________

Table 3. Bond lengths [Å] and angles [°] for Cu3(CN)3(2,2'-biquin)2.

_____________________________________________________

Cu(2)-N(1)#1 1.828(3)

Cu(2)-C(1)#1 1.828(3)

Cu(2)-C(1) 1.828(3)

Cu(1)-C(2) 1.902(4)

Cu(1)-C(3) 1.950(3)

Cu(1)-N(4) 2.0947(18)

Cu(1)-N(4)#2 2.0947(18)

N(4)-C(4) 1.330(3)

N(4)-C(12) 1.369(3)

C(4)-C(5) 1.415(3)

C(4)-C(4)#2 1.495(4)

C(5)-C(6) 1.367(3)

C(6)-C(7) 1.411(3)

C(7)-C(12) 1.416(3)

C(7)-C(8) 1.425(3)

C(8)-C(9) 1.365(4)

C(9)-C(10) 1.408(4)

C(10)-C(11) 1.370(4)

C(11)-C(12) 1.417(3)

C(1)-C(2) 1.157(4)

C(3)-N(3)#3 1.161(6)

C(3)-C(3)#3 1.161(6)

N(1)#1-Cu(2)-C(1)#1 0.00(18)

N(1)#1-Cu(2)-C(1) 180.00(5)

C(1)#1-Cu(2)-C(1) 180.00(5)

C(2)-Cu(1)-C(3) 129.33(13)

C(2)-Cu(1)-N(4) 115.87(9)

C(3)-Cu(1)-N(4) 102.76(8)

C(2)-Cu(1)-N(4)#2 115.87(9)

C(3)-Cu(1)-N(4)#2 102.76(8)

N(4)-Cu(1)-N(4)#2 77.99(10)

C(4)-N(4)-C(12) 119.1(2)

C(4)-N(4)-Cu(1) 115.59(15)

C(12)-N(4)-Cu(1) 125.24(16)

N(4)-C(4)-C(5) 122.2(2)

N(4)-C(4)-C(4)#2 115.40(12)

C(5)-C(4)-C(4)#2 122.32(13)

C(6)-C(5)-C(4) 119.2(2)

C(5)-C(6)-C(7) 120.1(2)

C(6)-C(7)-C(12) 117.5(2)

C(6)-C(7)-C(8) 123.7(2)

C(12)-C(7)-C(8) 118.8(2)

C(9)-C(8)-C(7) 120.2(2)

C(8)-C(9)-C(10) 120.8(2)

C(11)-C(10)-C(9) 120.6(3)

C(10)-C(11)-C(12) 120.0(2)

N(4)-C(12)-C(7) 121.8(2)

N(4)-C(12)-C(11) 118.5(2)

C(7)-C(12)-C(11) 119.6(2)

C(2)-C(1)-Cu(2) 179.0(3)

C(1)-C(2)-Cu(1) 178.0(3)

N(3)#3-C(3)-C(3)#3 0.0(3)

N(3)#3-C(3)-Cu(1) 173.4(4)

C(3)#3-C(3)-Cu(1) 173.4(4)

_____________________________________________________________

Symmetry transformations used to generate equivalent atoms:

#1 -x,-y,-z #2 x,-y,z #3 -x+1,-y,-z

Table 4. Anisotropic displacement parameters (Å2x 103) for Djc38. The anisotropic

displacement factor exponent takes the form: -22[ h2 a*2U11 + ... + 2 h k a* b* U12 ]

________________________________________________________________________

U11 U22 U33 U23 U13 U12

________________________________________________________________________

Cu(2) 17(1) 29(1) 33(1) 0 9(1) 0

Cu(1) 19(1) 22(1) 18(1) 0 5(1) 0

N(4) 13(1) 19(1) 19(1) 0(1) 1(1) 0(1)

C(4) 13(1) 22(1) 18(1) 1(1) 1(1) 0(1)

C(5) 24(1) 26(1) 20(1) 2(1) 6(1) 3(1)

C(6) 22(1) 25(1) 27(1) 9(1) 6(1) 1(1)

C(7) 15(1) 20(1) 32(1) 4(1) 0(1) -1(1)

C(8) 22(1) 21(1) 44(2) 7(1) 1(1) -1(1)

C(9) 29(1) 18(1) 54(2) -3(1) -3(1) -1(1)

C(10) 36(2) 26(1) 38(1) -12(1) -1(1) 2(1)

C(11) 27(1) 24(1) 27(1) -3(1) -1(1) 2(1)

C(12) 15(1) 19(1) 27(1) -1(1) -1(1) 1(1)

C(1) 18(2) 23(2) 29(2) 0 8(1) 0

C(2) 32(2) 23(2) 28(2) 0 4(1) 0

C(3) 24(1) 23(1) 16(1) 0 6(1) 0

N(1) 18(2) 23(2) 29(2) 0 8(1) 0

N(2) 32(2) 23(2) 28(2) 0 4(1) 0

N(3) 24(1) 23(1) 16(1) 0 6(1) 0

________________________________________________________________________

Table 5. Hydrogen coordinates ( x 104) and isotropic displacement parameters (Å2x 10 3) for Cu3(CN)3(2,2'-biquin)2.

________________________________________________________________________

x y z U(eq)

________________________________________________________________________

H(5) 3945 704 -7691 27

H(6) 3985 2202 -7511 29

H(8) 3870 3572 -5682 35

H(9) 3706 4163 -3053 41

H(10) 3472 3273 -732 40

H(11) 3373 1786 -1051 32

________________________________________________________________________
