# Supplementary material for: Solid state coordination chemistry: ligand influences on the structures of one-dimensional copper(i) cyanide–organodiimine solids
Source: Royal Society of Chemistry journal article supplement (doi:10.1039/b100392p), 2001-01-01
Supplement: b100392p-4.doc [file b100392p-4.doc]

Table 1 Crystal data and structure refinement for Cu2(CN)2(dpdp).

Identification code [Cu2(CN)2(dpdp)]

Empirical formula C24H16Cu2N4

Formula weight 487.49

Temperature 293(2) K

Wavelength 0.71073 Å

Crystal system Monoclinic

Space group P2(1)/c

Unit cell dimensions a = 12.112(2) Å = 90°.

b = 9.9414(18) Å = 93.743(5)°.

c = 16.308(3) Å  = 90°.

Volume 1959.5(7) Å3

Z 4

Density (calculated) 1.652 Mg/m3

Absorption coefficient 2.189 mm-1

F(000) 984

Crystal size 0.15 x 0.13 x 0.09 mm3

Theta range for data collection 1.68 to 28.33°.

Index ranges -16<=h<=11, -13<=k<=13, -21<=l<=19

Reflections collected 11982

Independent reflections 4639 [R(int) = 0.0610]

Completeness to theta = 28.33° 94.9 %

Absorption correction SADABS

Refinement method Full-matrix least-squares on F2

Data / restraints / parameters 4639 / 0 / 271

Goodness-of-fit on F2 1.054

Final R indices [I>2sigma(I)] R1 = 0.0560, wR2 = 0.0916

R indices (all data) R1 = 0.0988, wR2 = 0.1038

Largest diff. peak and hole 0.633 and -0.524 e.Å-3

Table 2. Atomic coordinates ( x 104) and equivalent isotropic displacement parameters (Å2x 103) for Cu2(CN)2(dpdp). U(eq) is defined as one third of the trace of the orthogonalized Uij tensor.

________________________________________________________________________

x y z U(eq)

________________________________________________________________________

Cu(1) 2426(1) 10190(1) 4934(1) 17(1)

Cu(2) 2333(1) 7920(1) 2247(1) 23(1)

N(5) 1388(3) 11781(3) 5257(2) 13(1)

N(6) 3426(3) 11856(3) 4742(2) 14(1)

N(1) 2558(3) 8952(4) 5832(2) 27(1)

N(2) 2197(3) 9520(3) 3801(2) 14(1)

N(3) 2211(3) 8981(4) 3171(2) 22(1)

N(4) 2534(3) 6790(3) 1380(2) 16(1)

C(1) 2558(3) 8952(4) 5832(2) 27(1)

C(2) 2197(3) 9520(3) 3801(2) 14(1)

C(3) 2211(3) 8981(4) 3171(2) 22(1)

C(4) 2534(3) 6790(3) 1380(2) 16(1)

C(5) 168(3) 16504(4) 6193(2) 18(1)

C(6) -332(4) 17578(4) 6573(2) 20(1)

C(7) -1092(4) 17353(4) 7147(2) 21(1)

C(8) -1354(3) 16048(4) 7357(2) 22(1)

C(9) -869(3) 14968(4) 6981(2) 18(1)

C(10) -100(3) 15176(4) 6390(2) 15(1)

C(11) 414(3) 14027(4) 5974(2) 14(1)

C(12) -106(3) 12773(4) 5936(2) 16(1)

C(13) 414(3) 11695(4) 5598(2) 17(1)

C(14) 1424(3) 14118(4) 5621(2) 14(1)

C(15) 1880(3) 13005(4) 5253(2) 14(1)

C(16) 2921(3) 13062(4) 4827(2) 13(1)

C(17) 4377(3) 11861(4) 4368(2) 18(1)

C(18) 4837(3) 12995(4) 4046(2) 17(1)

C(19) 4300(3) 14234(4) 4096(2) 14(1)

C(20) 3329(3) 14242(4) 4501(2) 14(1)

C(21) 4763(3) 15463(4) 3725(2) 13(1)

C(22) 5601(3) 15382(4) 3178(2) 18(1)

C(23) 6064(4) 16514(4) 2852(2) 22(1)

C(24) 5696(4) 17778(4) 3060(2) 22(1)

C(25) 4848(3) 17886(4) 3581(2) 21(1)

C(26) 4383(3) 16750(4) 3906(2) 18(1)

________________________________________________________________________

Table 3. Bond lengths [Å] and angles [°] for Cu2(CN)2(dpdp).

_____________________________________________________

Cu(1)-N(1) 1.911(4)

Cu(1)-N(2) 1.966(3)

Cu(1)-N(6) 2.089(3)

Cu(1)-N(5) 2.109(3)

Cu(2)-N(4) 1.834(3)

Cu(2)-N(3) 1.854(4)

N(5)-C(13) 1.339(5)

N(5)-C(15) 1.355(5)

N(6)-C(17) 1.337(5)

N(6)-C(16) 1.357(5)

N(1)-C(4)#1 1.162(5)

N(1)-N(4)#1 1.162(5)

N(2)-N(3) 1.159(5)

N(4)-C(1)#2 1.162(5)

N(4)-N(1)#2 1.162(5)

C(5)-C(6) 1.392(5)

C(5)-C(10) 1.402(5)

C(6)-C(7) 1.374(6)

C(7)-C(8) 1.385(6)

C(8)-C(9) 1.386(5)

C(9)-C(10) 1.398(5)

C(10)-C(11) 1.486(5)

C(11)-C(14) 1.388(5)

C(11)-C(12) 1.397(5)

C(12)-C(13) 1.376(5)

C(14)-C(15) 1.391(5)

C(15)-C(16) 1.479(5)

C(16)-C(20) 1.391(5)

C(17)-C(18) 1.377(5)

C(18)-C(19) 1.398(5)

C(19)-C(20) 1.386(5)

C(19)-C(21) 1.490(5)

C(21)-C(22) 1.396(5)

C(21)-C(26) 1.397(5)

C(22)-C(23) 1.380(5)

C(23)-C(24) 1.382(6)

C(24)-C(25) 1.380(6)

C(25)-C(26) 1.383(5)

N(1)-Cu(1)-N(2) 120.10(15)

N(1)-Cu(1)-N(6) 127.24(15)

N(2)-Cu(1)-N(6) 100.10(13)

N(1)-Cu(1)-N(5) 108.22(14)

N(2)-Cu(1)-N(5) 116.06(13)

N(6)-Cu(1)-N(5) 78.67(12)

N(4)-Cu(2)-N(3) 175.46(17)

C(13)-N(5)-C(15) 117.4(3)

C(13)-N(5)-Cu(1) 127.7(2)

C(15)-N(5)-Cu(1) 113.7(3)

C(17)-N(6)-C(16) 116.8(3)

C(17)-N(6)-Cu(1) 126.6(2)

C(16)-N(6)-Cu(1) 114.5(3)

C(4)#1-N(1)-N(4)#1 0.0(4)

C(4)#1-N(1)-Cu(1) 173.7(4)

N(4)#1-N(1)-Cu(1) 173.7(4)

N(3)-N(2)-Cu(1) 168.3(3)

N(2)-N(3)-Cu(2) 171.9(4)

C(1)#2-N(4)-N(1)#2 0.0(4)

C(1)#2-N(4)-Cu(2) 173.7(3)

N(1)#2-N(4)-Cu(2) 173.7(3)

C(6)-C(5)-C(10) 120.5(4)

C(7)-C(6)-C(5) 120.5(4)

C(6)-C(7)-C(8) 119.7(4)

C(7)-C(8)-C(9) 120.4(4)

C(8)-C(9)-C(10) 120.7(4)

C(9)-C(10)-C(5) 118.1(4)

C(9)-C(10)-C(11) 121.2(3)

C(5)-C(10)-C(11) 120.7(3)

C(14)-C(11)-C(12) 116.6(3)

C(14)-C(11)-C(10) 123.1(3)

C(12)-C(11)-C(10) 120.4(3)

C(13)-C(12)-C(11) 119.7(4)

N(5)-C(13)-C(12) 123.7(4)

C(11)-C(14)-C(15) 120.8(3)

N(5)-C(15)-C(14) 121.7(3)

N(5)-C(15)-C(16) 115.2(3)

C(14)-C(15)-C(16) 123.1(3)

N(6)-C(16)-C(20) 122.1(3)

N(6)-C(16)-C(15) 114.7(3)

C(20)-C(16)-C(15) 123.1(3)

N(6)-C(17)-C(18) 124.0(4)

C(17)-C(18)-C(19) 119.8(4)

C(20)-C(19)-C(18) 116.5(4)

C(20)-C(19)-C(21) 122.9(3)

C(18)-C(19)-C(21) 120.6(3)

C(19)-C(20)-C(16) 120.7(4)

C(22)-C(21)-C(26) 116.7(3)

C(22)-C(21)-C(19) 121.4(3)

C(26)-C(21)-C(19) 121.9(3)

C(23)-C(22)-C(21) 122.0(4)

C(22)-C(23)-C(24) 120.1(4)

C(25)-C(24)-C(23) 119.1(4)

C(24)-C(25)-C(26) 120.7(4)

C(25)-C(26)-C(21) 121.3(4)

_____________________________________________________________

Symmetry transformations used to generate equivalent atoms:

#1 x,-y+3/2,z+1/2 #2 x,-y+3/2,z-1/2

Table 4. Anisotropic displacement parameters (Å2x 103) for Cu2(CN)2(dpdp). The anisotropic displacement factor exponent takes the form: -22[ h2 a*2U11 + ... + 2 h k a* b* U12 ]

________________________________________________________________________

U11 U22 U33 U23 U13 U12

________________________________________________________________________

Cu(1) 22(1) 11(1) 18(1) 0(1) 5(1) 1(1)

Cu(2) 26(1) 23(1) 20(1) -10(1) 9(1) -7(1)

N(5) 18(2) 13(2) 8(2) 0(1) 2(1) 1(1)

N(6) 17(2) 13(2) 13(2) -2(1) 3(1) 2(1)

N(1) 21(2) 27(2) 34(2) -6(2) 6(2) 4(2)

N(2) 16(2) 11(2) 15(2) -1(1) 2(2) -3(2)

N(3) 20(2) 21(2) 25(2) 1(2) 5(2) -3(2)

N(4) 16(2) 18(2) 15(2) -12(2) 6(2) -6(2)

C(1) 21(2) 27(2) 34(2) -6(2) 6(2) 4(2)

C(2) 16(2) 11(2) 15(2) -1(1) 2(2) -3(2)

C(3) 20(2) 21(2) 25(2) 1(2) 5(2) -3(2)

C(4) 16(2) 18(2) 15(2) -12(2) 6(2) -6(2)

C(5) 21(2) 20(2) 13(2) 2(2) 1(2) -2(2)

C(6) 31(3) 12(2) 17(2) -1(2) -5(2) 7(2)

C(7) 23(2) 21(2) 17(2) -8(2) -2(2) 9(2)

C(8) 17(2) 31(2) 19(2) -2(2) 6(2) 6(2)

C(9) 19(2) 14(2) 20(2) -2(2) 3(2) 0(2)

C(10) 12(2) 18(2) 15(2) -4(2) -2(2) 4(2)

C(11) 20(2) 11(2) 11(2) 2(2) -2(2) -1(2)

C(12) 14(2) 18(2) 16(2) -2(2) 4(2) 0(2)

C(13) 23(2) 12(2) 15(2) 0(2) -3(2) -3(2)

C(14) 16(2) 7(2) 18(2) 1(2) 0(2) -1(2)

C(15) 17(2) 14(2) 11(2) 3(2) 1(2) 2(2)

C(16) 17(2) 14(2) 9(2) 0(2) 1(2) 1(2)

C(17) 23(2) 14(2) 16(2) -3(2) 4(2) 4(2)

C(18) 16(2) 21(2) 14(2) -3(2) 3(2) 4(2)

C(19) 13(2) 16(2) 12(2) -2(2) -1(2) -1(2)

C(20) 19(2) 10(2) 13(2) 0(2) -2(2) 1(2)

C(21) 14(2) 16(2) 10(2) -2(2) 0(2) -3(2)

C(22) 23(2) 15(2) 16(2) -1(2) 4(2) -1(2)

C(23) 19(2) 25(2) 23(2) 5(2) 7(2) -2(2)

C(24) 22(2) 23(2) 20(2) 3(2) -2(2) -4(2)

C(25) 23(2) 14(2) 25(2) 0(2) -2(2) -2(2)

C(26) 18(2) 18(2) 16(2) 0(2) 2(2) -1(2)

________________________________________________________________________

Table 5. Hydrogen coordinates ( x 104) and isotropic displacement parameters (Å2x 10 3) for Cu2(CN)2(dpdp).

________________________________________________________________________

x y z U(eq)

________________________________________________________________________

H(5) 682 16669 5807 21

H(6) -149 18455 6436 24

H(7) -1429 18075 7393 25

H(8) -1859 15894 7752 27

H(9) -1057 14095 7122 21

H(12) -802 12666 6138 19

H(13) 69 10860 5606 20

H(14) 1800 14934 5631 17

H(17) 4750 11049 4324 21

H(18) 5504 12936 3795 20

H(20) 2946 15044 4556 17

H(22) 5854 14540 3029 22

H(23) 6624 16427 2492 26

H(24) 6017 18545 2851 26

H(25) 4586 18732 3715 25

H(26) 3807 16844 4251 21

________________________________________________________________________
